# Supplementary material for: CAR T-cell therapy for secondary CNS DLBCL
Source: PubMed Central journal article supplement — Blood Adv. 2021 Dec 28;5(24):5626–30. doi: 10.1182/bloodadvances.2021005292 (PMC8714710; doi:10.1182/bloodadvances.2021005292), 2021-12-28
Supplement: advancesADV2021005292-suppl1.pdf [file advancesADV2021005292-suppl1.pdf]

**Supplemental Table (S1) – Prior Treatments, Last Chemo interval to chemo and baseline labs prior to CAR T-cell therapy. Definition of disease responses.**

| Pt | Prior treatments                                          | Last Chemo Date                  | Platelets (normal 165 - 366 10 <sup>3</sup> /ul) | Lactate Dehydrogenase (normal 135 - 225 unit/L) | CRP (normal 0.00 - 0.50 mg/dl) | Ferritin (normal 30 - 400 ng/dl) |
|----|-----------------------------------------------------------|----------------------------------|--------------------------------------------------|-------------------------------------------------|--------------------------------|----------------------------------|
| 1  | R-CHOP -> R-EPOCH, RICE, R-GDP + Benda EAM Auto, R-HDMTX, | 2 months prior to CAR-T infusion | 120                                              | 205                                             | N/A                            | N/A                              |
| 2  | R-CHOP, RICE, HD-MTX, WBRT + Ibrutinib + IT Ara-C         | 1 week prior to CAR-T infusion   | 26                                               | 327                                             | N/A                            | N/A                              |
| 3  | CODOX-M-IVAC, HD-MTX, HiDAC, WBRT                         | 3 months prior to CAR-T infusion | 61                                               | 138                                             | 1.9                            | 1085                             |
| 4  | R-CHOP/R-EPOCH, IT Chemo+IFRT                             | Not Available                    | 201                                              | 305                                             | 0.8                            | 247                              |
| 5  | R-CHOP/R-EPOCH, R-MTX-Temodar, RICE+Auto, Brain RT        | 8 months prior to CAR-T infusion | 128                                              | 180                                             | N/A                            | N/A                              |
| 6  | R-CHOP, VIA, RT                                           | 1 month prior to CAR-T infusion  | 291                                              | 190                                             | N/A                            | N/A                              |
| 7  | DA-EPOCH + HD-MTX + IT Chemo; R-IVAC; R-Pola              | 1 month prior to CAR-T infusion  | 127                                              | 188                                             | N/A                            | N/A                              |

**Definition of Responses**

Systemic Disease: We utilized PET CT results with Deauville 1, 2 and 3 for complete response.

CNS Disease: We used either or both MRI of the brain and lumbar puncture (LP) as clinically indicated. Anyone with increase in lesion size on MRI were categorized as progressive disease (PD), anyone with unchanged dimensions were stable disease (SD), while size reduction with residual contrast enhancement was deemed a partial response (PR), and a complete response (CR) was defined as size reduction with no residual contrast enhancement. Patients who had an LP done were categorized as PD if patients had cleared their spinal fluid and had a re-occurrence, SD for lymphoma cell persistence, or CR on clearing of lymphoma cells from spinal fluid either prior to CAR or after CAR.
